# Supplementary material for: Design, synthesis and catalytic performance of vanadium-incorporated mesoporous silica KIT-6 catalysts for the oxidative dehydrogenation of propane to propylene
Source: Royal Society of Chemistry journal article supplement (doi:10.1039/c6cy00404k), 2016-01-01
Supplement: c6cy00404k1.pdf [file c6cy00404k1.pdf]

## Supplementary Information

### **Design, Synthesis and Catalytic Performances of Vanadium- incorporated Mesoporous Silica KIT-6 Catalysts for the Oxidative Dehydrogenation of Propane to Propylene**

Qinglong Liu,<sup>1</sup> Jianmei Li,<sup>1,†</sup> Zhen Zhao,<sup>\*,1,2</sup> Manglai Gao,<sup>1</sup> Lian Kong,<sup>1</sup> Jian Liu,<sup>1</sup>  
Yuechang Wei<sup>1</sup>

<sup>1</sup>State Key Laboratory of Heavy Oil Processing, China University of Petroleum,  
Chang Ping, Beijing 102249, China

<sup>2</sup>Institute of Catalysis for Energy and Environment, Shenyang Normal University,  
Shenyang 110034, China

\*Corresponding Author

E-mail: [zhenzhao@cup.edu.cn](mailto:zhenzhao@cup.edu.cn); [zhaozhen@synu.edu.cn](mailto:zhaozhen@synu.edu.cn) (Zhen Zhao)

†This author contributed equally as the first author.

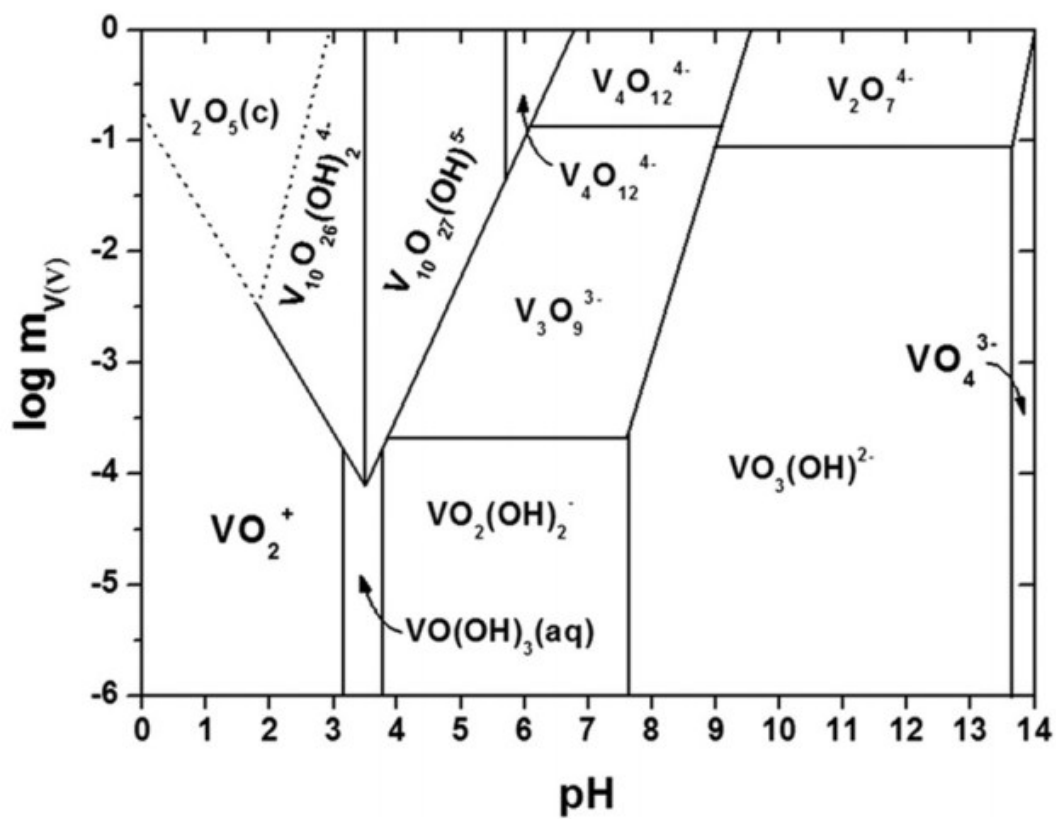

**Fig. S1** Aqueous phase equilibrium chemistry of vanadium oxide as a function of both the concentration of vanadium and pH of the solution.<sup>1,2</sup>

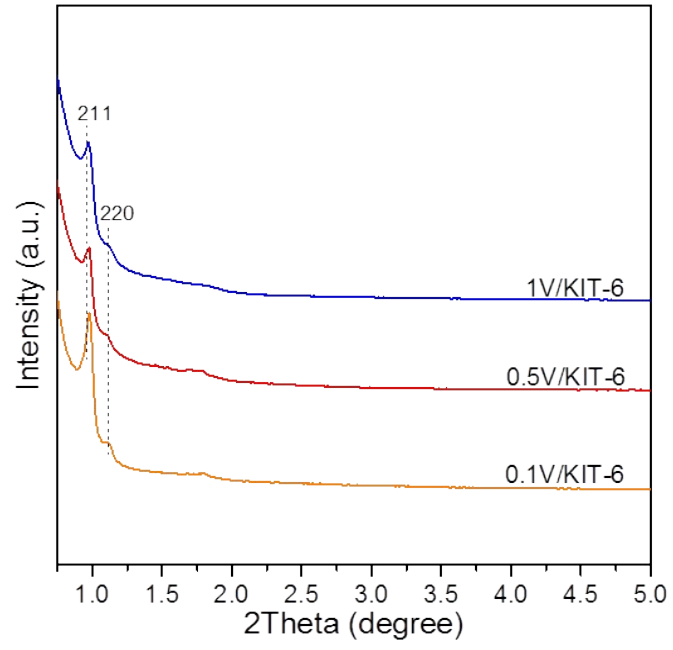

**Fig. S2** Low-angle XRD patterns of V/KIT-6 samples.

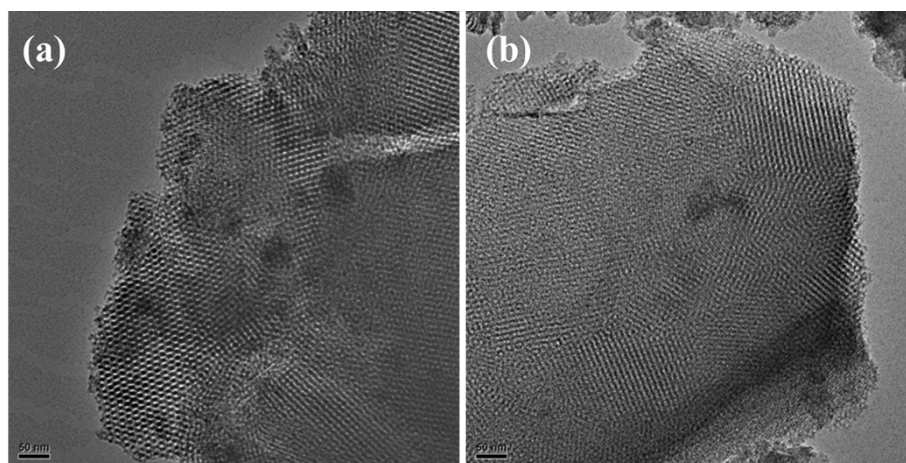

**Fig. S3** TEM images of V/KIT-6 samples: (a) 0.5V/KIT-6, (b) 1V/KIT-6.

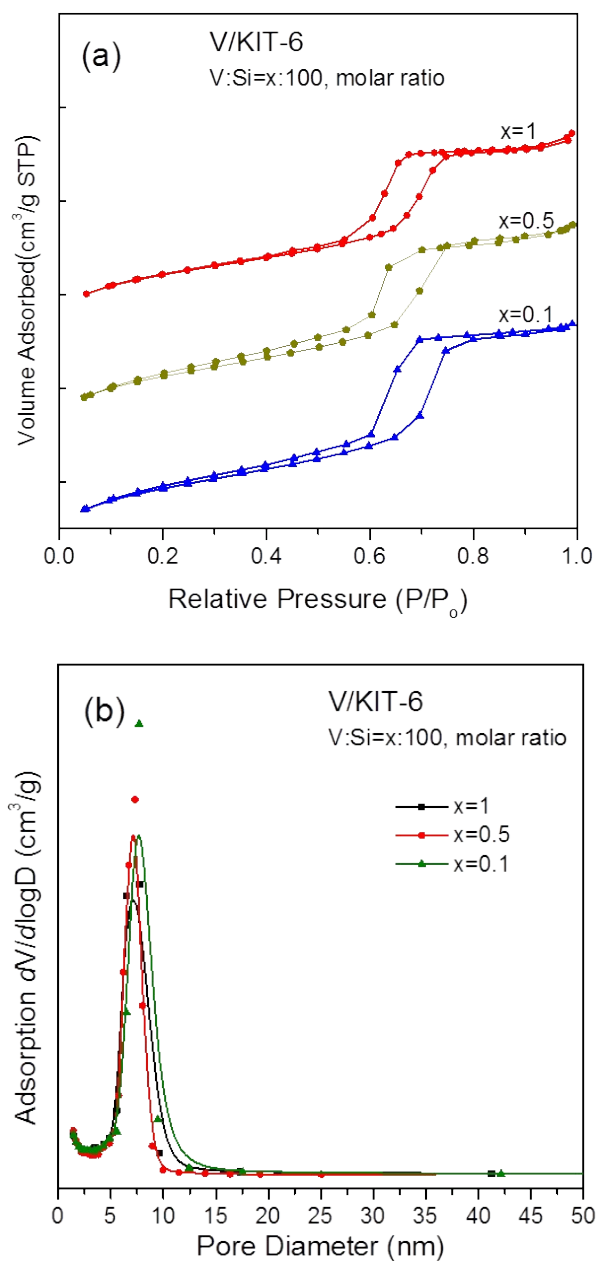

**Fig. S4** (a) The N<sub>2</sub> adsorption-desorption isotherms and (b) pore-size distribution of V/KIT-6 samples.

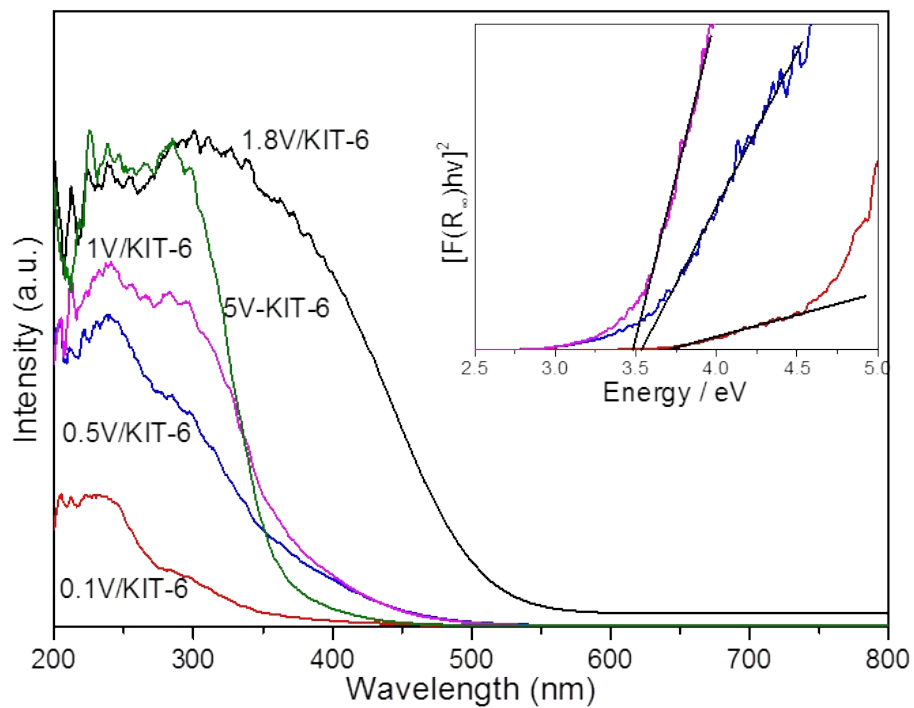

**Fig. S5** UV-Vis diffuse reflectance spectra of 5V-KIT-6 and V/KIT-6 samples with different V contents. Inset shows least-squares fits of a line through the low edge energy of the transformed spectra.

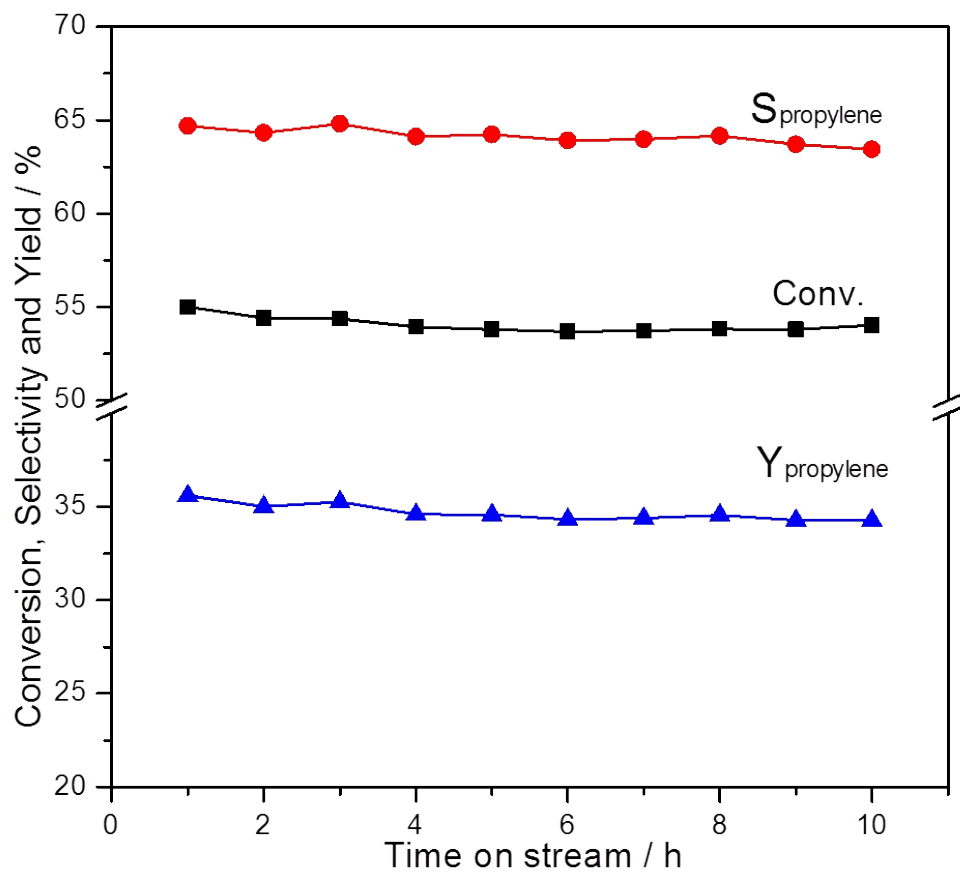

**Fig. S6**  $\text{C}_3\text{H}_8$  conversion,  $\text{C}_3\text{H}_6$  selectivity and yield as a function of reaction time for ODH of propane over 5V-KIT-6 catalyst. Reaction conditions: catalyst weight = 0.10 g,  $T=600\text{ }^\circ\text{C}$ ,  $\text{C}_3\text{H}_8/\text{O}_2/\text{N}_2 = 1/1/8$ , flow rate =  $40.0\text{ mL min}^{-1}$ .

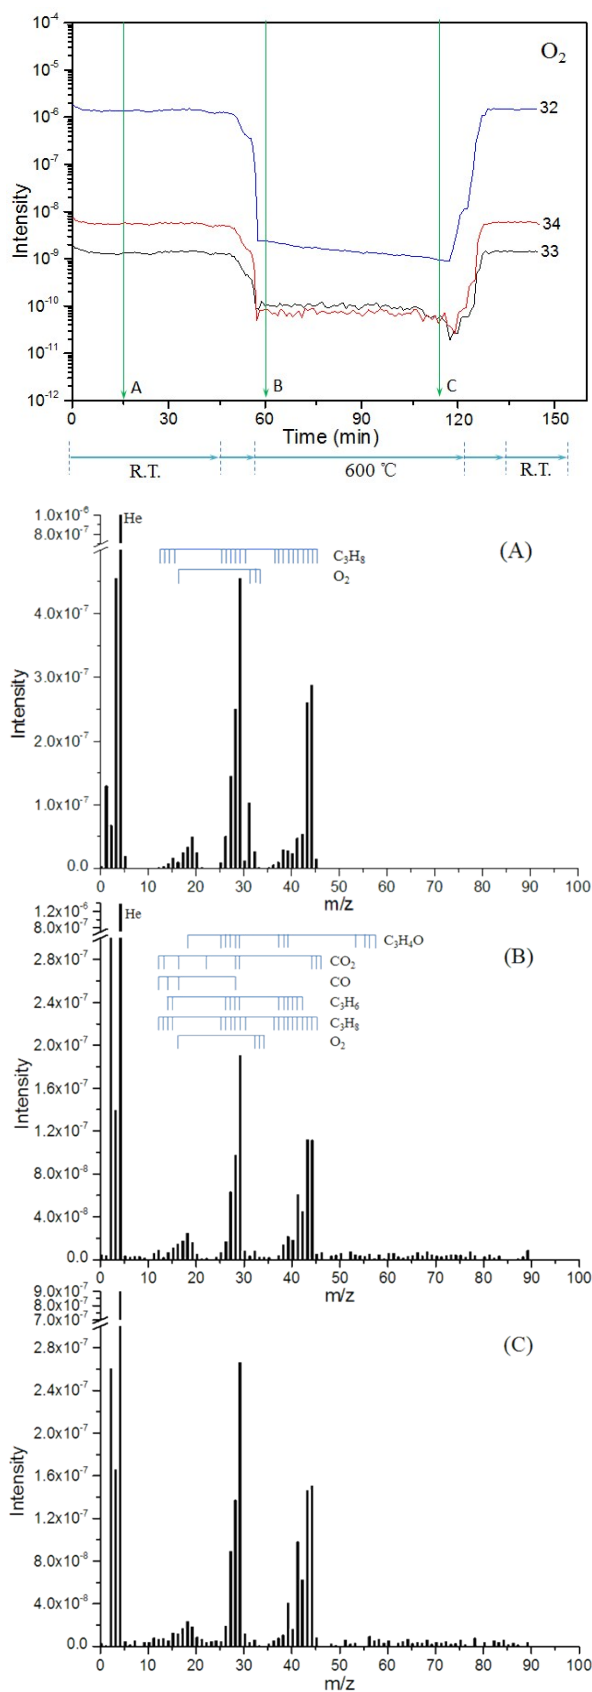

**Fig. S7** MS spectra of the components in the reaction mixture for the ODH of propane over 5V-KIT-6 catalyst and the standard samples from the MS library. (A) before reaction, (B) reacting at  $600\text{ }^\circ\text{C}$ , (C) after 1 h reaction at  $600\text{ }^\circ\text{C}$ .



**Table S1** Physico-chemical properties of V/KIT-6 samples.

| Samples    | V:Si (molar ratio in recipe) | V:Si <sup>a</sup> (final molar ratio) | S <sub>BET</sub> <sup>b</sup> (m <sup>2</sup> /g) | V <sub>p</sub> <sup>c</sup> (cm <sup>3</sup> /g) | D <sup>d</sup> (nm) | d <sub>211</sub> | a <sub>0</sub> <sup>e</sup> (nm) | δ <sup>f</sup> (nm) | E <sub>g</sub> <sup>g</sup> (eV) |
|------------|------------------------------|---------------------------------------|---------------------------------------------------|--------------------------------------------------|---------------------|------------------|----------------------------------|---------------------|----------------------------------|
| 0.1V/KIT-6 | 0.10:100                     | 0.12:100                              | 724                                               | 0.80                                             | 8.0                 | 9.08             | 22.2                             | 3.1                 | 3.70                             |
| 0.5V/KIT-6 | 0.50:100                     | 0.53:100                              | 648                                               | 0.75                                             | 7.8                 | 9.08             | 22.2                             | 3.3                 | 3.52                             |
| 1V/KIT-6   | 1.00:100                     | 1.04:100                              | 621                                               | 0.72                                             | 7.8                 | 9.07             | 22.2                             | 3.3                 | 3.48                             |

<sup>a</sup> V:Si molar ratio measured by XPS. <sup>b</sup> S<sub>BET</sub> is the specific surface area calculated by BET method.

<sup>c</sup> V<sub>p</sub> is the total pore volume of pores. <sup>d</sup> D is the pore diameter. <sup>e</sup> XRD unit-cell parameter estimated from the position of the (211) diffraction line ( $a_0 = 6^{1/2}d_{211}$ ).

<sup>f</sup> the pore wall thickness  $\delta = a_0/2 - D_p$ . <sup>g</sup> E<sub>g</sub> is the absorption edge energy.

**Table S2.** The catalytic performances for the oxidative dehydrogenation of propane over various catalysts <sup>a</sup>

| Catalysts                                                  | T/°C | Conv./% | S <sub>C<sub>3</sub>H<sub>6</sub></sub> /% | Y <sub>C<sub>3</sub>H<sub>6</sub></sub> /% | STY <sub>C<sub>3</sub>H<sub>6</sub></sub> /kg kg <sub>cat</sub> <sup>-1</sup> h <sup>-1</sup> | References | Notes                           |
|------------------------------------------------------------|------|---------|--------------------------------------------|--------------------------------------------|-----------------------------------------------------------------------------------------------|------------|---------------------------------|
| V-KIT-6                                                    | 600  | 47.6    | 59.8                                       | 28.5                                       | 3.91                                                                                          | This work  |                                 |
| V/SBA-15                                                   | 600  | 41.7    | 57.0                                       | 23.8                                       | 0.99                                                                                          | 3          |                                 |
| V-SBA-15                                                   | 600  | 48.6    | 41.8                                       | 20.3                                       | 3.35                                                                                          | 4          |                                 |
| V/MCF                                                      | 550  | 40.8    |                                            | 27.9                                       | 3.77                                                                                          | 5          |                                 |
| V/Sb/TiO <sub>2</sub>                                      | 500  | 25.4    | 42.6                                       | 10.8                                       | 2.02                                                                                          | 6          |                                 |
| V/MCM-41                                                   | 550  | 49.1    | 17.2                                       | 8.6                                        | 0.41                                                                                          | 7          |                                 |
| Pt/Al <sub>2</sub> O <sub>3</sub>                          | 400  | 14.0    | 37.0                                       | 5.2                                        | 1.59                                                                                          | 8          |                                 |
| V/γ-Al <sub>2</sub> O <sub>3</sub>                         | 350  | 23.0    | 49.1                                       | 11.3                                       | 10.6                                                                                          | 9          |                                 |
| Cr–Al pillared clay                                        | 450  | 26.7    | 38.0                                       | 10.3                                       | 0.28                                                                                          | 10         |                                 |
| V–Sb–O/SiO <sub>2</sub>                                    | 600  | 40.1    | 65.6                                       | 26.3                                       | 4.34                                                                                          | 11         |                                 |
| Fe-ZSM-5                                                   | 450  | 50      | 44                                         | 22                                         | 16.5                                                                                          | 12         | N <sub>2</sub> O as the oxidant |
| P-Nanodiamond                                              | 500  | ~20     | ~45                                        | ~9                                         | -                                                                                             | 13         |                                 |
| K-Mo/SiO <sub>2</sub> /TiO <sub>2</sub>                    | 550  | -       | -                                          | ~30                                        | -                                                                                             | 14         |                                 |
| flame-made V <sub>2</sub> O <sub>5</sub> /SiO <sub>2</sub> | 550  | 23.7    | 33.2                                       | 7.9                                        | 1.8                                                                                           | 15         |                                 |
| V/Ti/SBA-15                                                | 500  | 2-6     | -                                          | -                                          | 6-9                                                                                           | 16         |                                 |
| V/TiO <sub>2</sub>                                         | 500  | 30.4    | 22.8                                       | 6.9                                        | 1.43                                                                                          | 17         |                                 |

<sup>a</sup> T: Reaction temperature; Conv.: Conversion of propane; S<sub>C<sub>3</sub>H<sub>6</sub></sub>: Selectivity of propylene; Y<sub>C<sub>3</sub>H<sub>6</sub></sub>: Yield of propylene; STY<sub>C<sub>3</sub>H<sub>6</sub></sub>: Space-time yield of propylene.

**Table S3** the TOF values for propylene formation over various catalysts for ODH of propane.

| Catalyst                                                        | V:Si,<br>molar ratio | TOF, s <sup>-1</sup> | References |
|-----------------------------------------------------------------|----------------------|----------------------|------------|
| 0.1V-KIT-6                                                      | 0.10:100             | 0.102                | this work  |
| 5V-KIT-6                                                        | 1.80:100             | 0.027                | this work  |
| V-MCF                                                           | 0.15:100             | 0.078                | 18         |
| V-MCF                                                           | 1.08:100             | 0.028                | 18         |
| V-SBA-15                                                        | 1.8:100              | 0.075                | 4          |
| V/Ti/SBA-15                                                     | 4 wt%                | ~0.076               | 16         |
| V-SBA-15<br>(treated by H <sub>2</sub> O <sub>2</sub> )         | ~1.76:100            | ~0.051               | 19         |
| V/MCF                                                           | ~3.29:100            | 0.026                | 5          |
| V/SBA-15                                                        | ~3.29:100            | 0.026                | 5          |
| V/SBA-15                                                        | ~1.18:100            | ~0.0036              | 3          |
| V-HMS                                                           | ~1.41:100            | 0.0012               | 20         |
| V <sub>2</sub> O <sub>5</sub> /SiO <sub>2</sub><br>(flame-made) | ~0.49:100            | 0.018                | 15         |
| V/MCM-48                                                        | ~4.24:100            | 0.0020               | 21         |
| V/SBA-16                                                        | ~4.24:100            | 0.0019               | 21         |
| Pt ALD                                                          | -                    | 0.43±0.04            | 8          |

## Notes and references

- 1 C. F. Baes Jr. and R. E. Mesmer, *The Hydrolysis of Cations*, Wiley, N.Y., 1970.
- 2 I. E. Wachs, *Dalton Trans.*, 2013, **42**, 11762.
- 3 Y. Liu, Y. Cao, N. Yi, W. Feng, W. Dai, S. Yan, H. He, K. Fan, *J. Catal.*, 2004, **224**, 417.
- 4 F. Ying, J. Li, C. Huang, W. Weng, H. Wan, *Catal. Lett.*, 2007, **115**, 137.
- 5 Y. Liu, W. Feng, T. Li, H. He, W. Dai, W. Huang, Y. Cao, K. Fan, *J. Catal.*, 2006, **239**, 125.
- 6 J. B. Stelzer, J. Caro, M. Fait, *Catal. Commun.*, 2005, **6**, 1.
- 7 J. Santamaría-Gonzalez, J. Luque-Zambrana, J. Mérida-Robles, P. Maireles-Torres, E. Rodríguez-Castellon, A. Jiménez-López, *Catal. Lett.*, 2000, **68**, 67.
- 8 T. D. Gould, A. M. Lubers, A. R. Corpuz, A. W. Weimer, J. L. Falconer, J. W. Medlin, *ACS Catal.*, 2015, **5**, 1344.
- 9 E. V. Kondratenko, M. Yu. Sinev, *Appl. Catal., A*, 2007, **325**, 353.
- 10 M. A. D. León, C. D. L. Santos, L. Latrónica, A. M. Cesio, C. a Volzone, J. Castiglioni, M. Sergio, *Chem. Eng. J.*, 2014, **241**, 336.
- 11 H. Zhang, S. Cao, Y. Zou, Y. Wang, X. Zhou, Yu Shen, X. Zheng, *Catal. Commun.*, 2014, **45**, 158.
- 12 J. Pérez-Ramírez, A. Gallardo-Llamas, *Appl. Catal., A*, 2005, **279**, 117.
- 13 X. Sun, Y. Ding, B. Zhang, R. Huang, D. Chen, D. S. Su, *ACS Catal.*, 2015, **5**, 2436.
- 14 R. B. Watson, U. S. Ozkan, *J. Catal.*, 2000, **191**, 12.
- 15 B. Schimmoeller, Y. Jiang, S. E. Pratsinis, A. Baiker, *J. Catal.*, 2010, **274**, 64.
- 16 C. Carrero, M. Kauer, A. Dinse, T. Wolfram, N. Hamilton, A. Trunschke, R. Schlögl, Reinhard Schomäcker, *Catal. Sci. Technol.*, 2014, **4**, 786.
- 17 A. A. Lemonidou, L. Nalbandian, I. A. Vasalos, *Catal. Today*, 2000, **61**, 333.
- 18 Y. Liu, S. Xie, Y. Cao, H. He, K. Fan, *J. Phys. Chem. C*, 2010, **114**, 5941.
- 19 J. Xu, M. Chen, Y. Liu, Yong Cao, H. He, K. Fan, *Microporous Mesoporous Mater.*, 2009, **118**, 354.
- 20 R. Bulánek, P. Čičmanec, H. Sheng-Yang, P. Knotek, L. Čapek, M. Setnička, *Applied Catalysis A*, 2012, **415-416**, 29.
- 21 R. Bulánek, A. Kalužová, M. Setnička, A. Zúkal, P. Čičmanec, J. Mayerová, *Catal. Today*, 2012, **179**, 149.
